# Supplementary material for: Cost-Effectiveness of Dapagliflozin versus Acarbose as a Monotherapy in Type 2 Diabetes in China
Source: PubMed Central journal article supplement (PMC5091768; doi:10.1371/journal.pone.0165629), 2016-11-02
Supplement: pone.0165629.s006.pdf [file pone.0165629.s006.pdf]

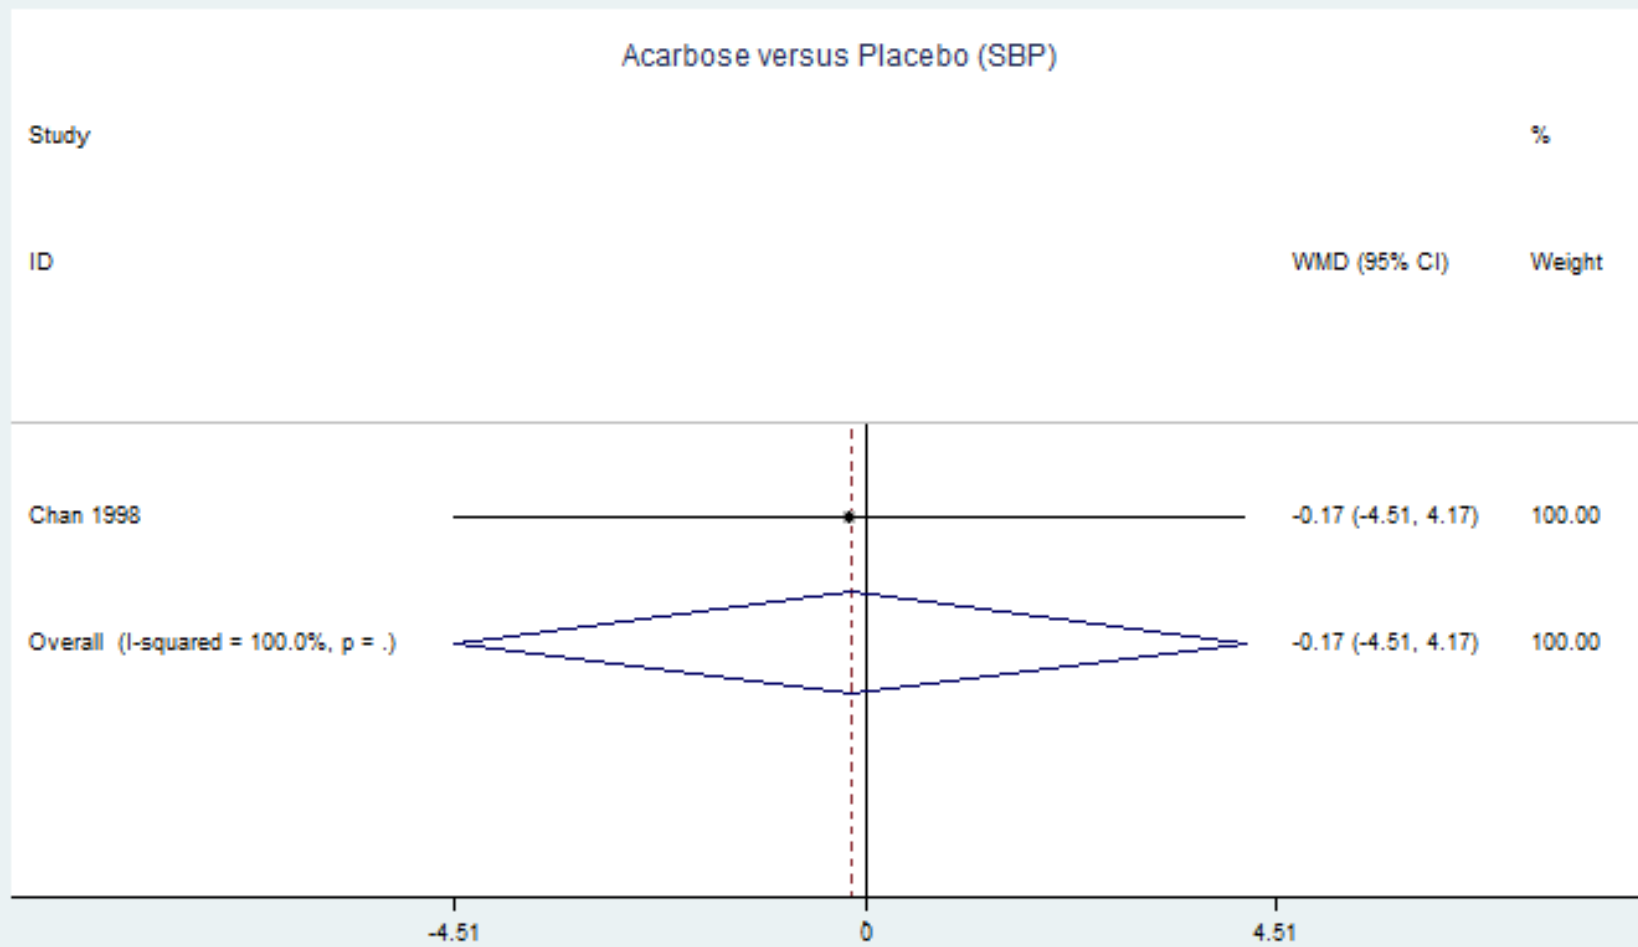

**S4 Fig. Meta-analysis of acarbose versus placebo on SBP**
